# Supplementary material for: Machine learning compensates fold-change method and highlights oxidative phosphorylation in the brain transcriptome of Alzheimer’s disease
Source: PubMed Central journal article supplement (PMC8249453; doi:10.1038/s41598-021-93085-z), 2021-07-01

# 1) AdaBoost + Decision Tree

## Top Level

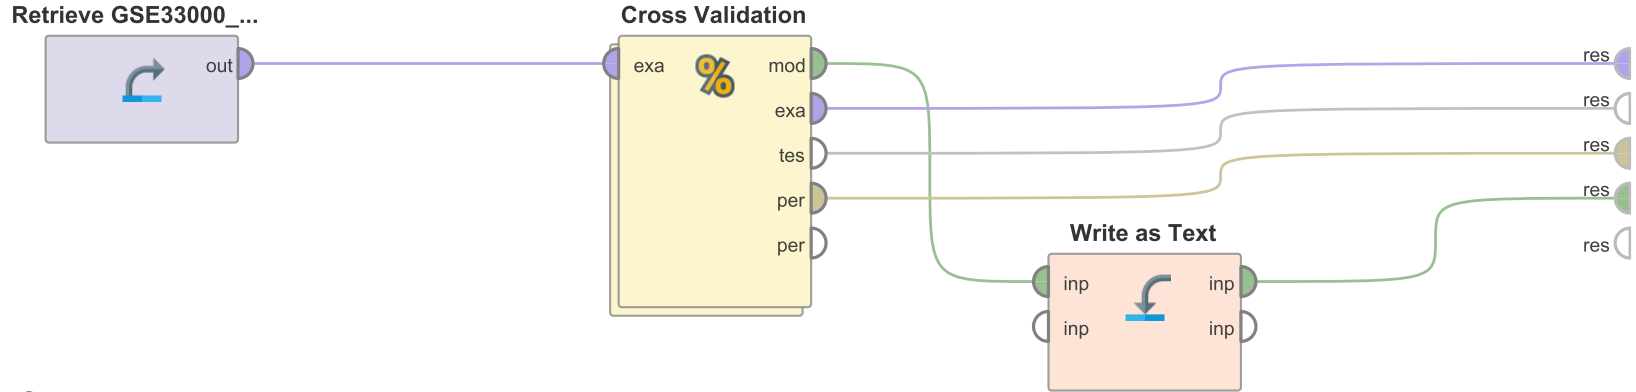

## Inside Cross Validation

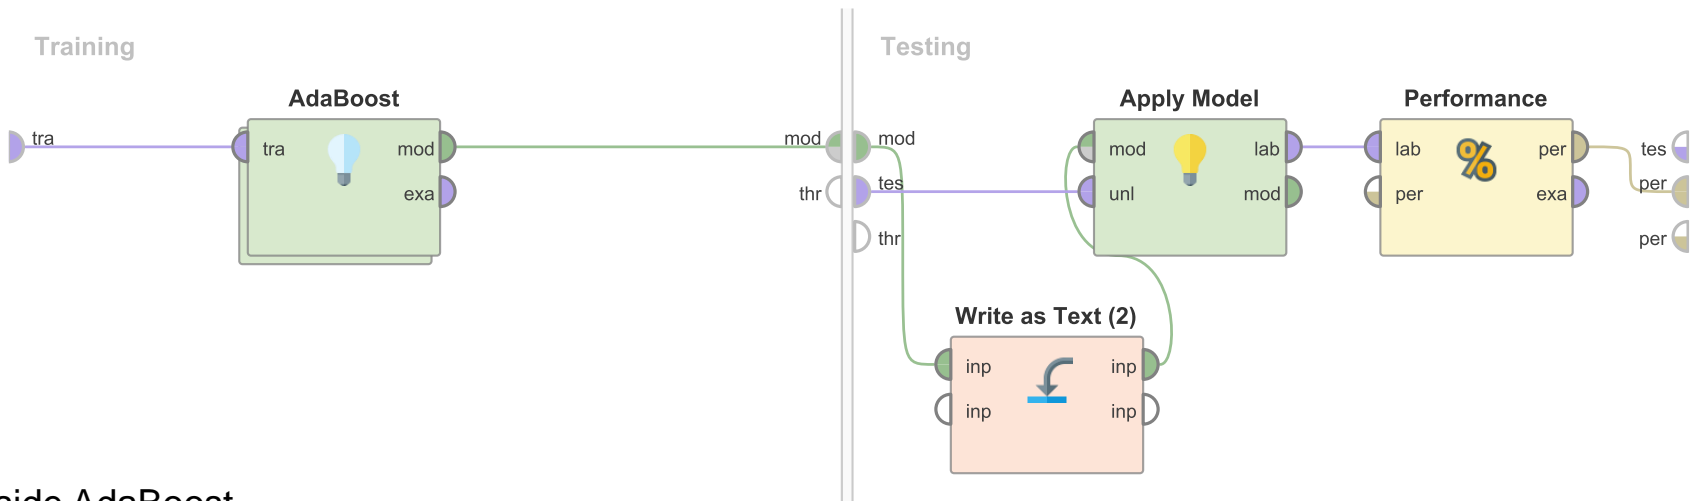

## Inside AdaBoost

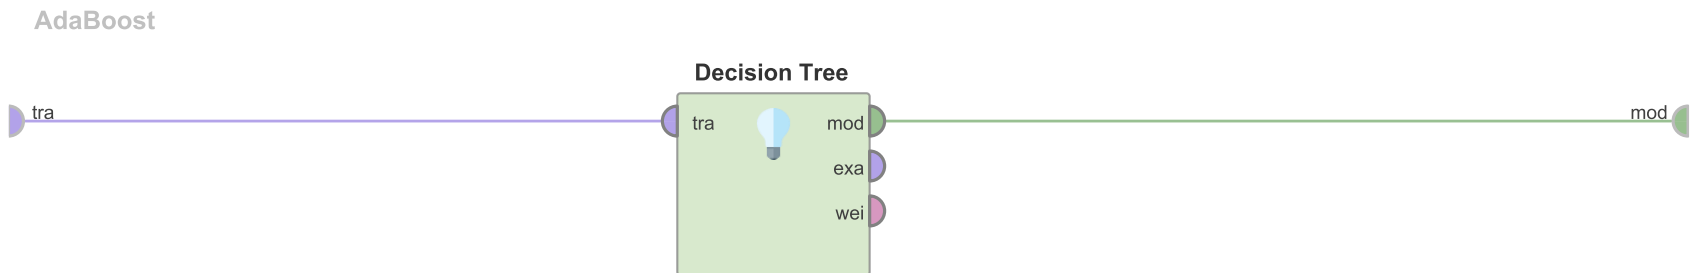

## 2) AdaBoost + Rule Induction

### Top Level

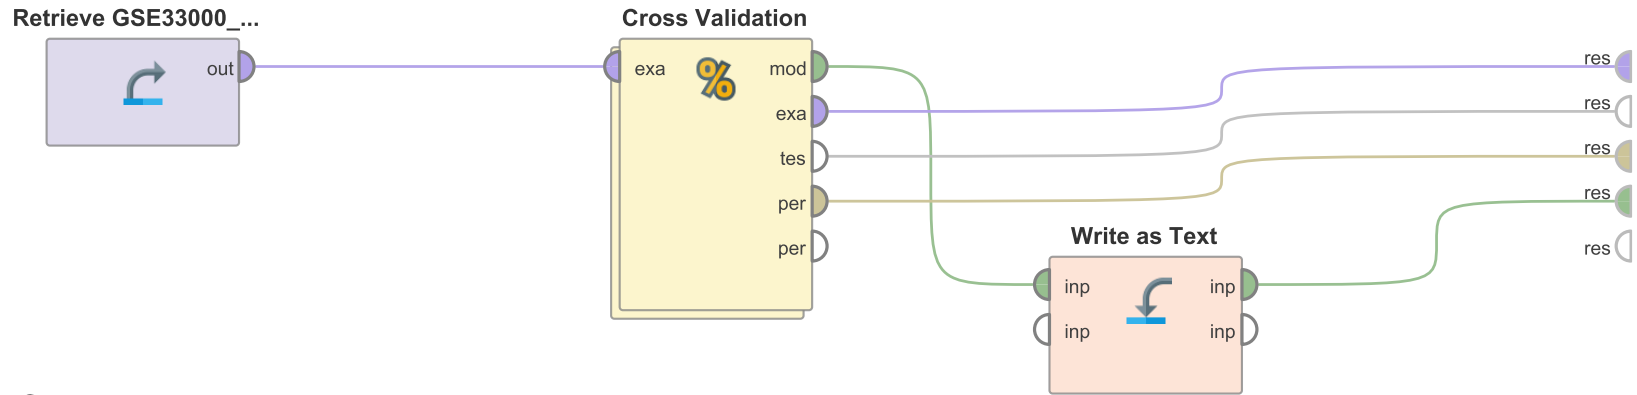

### Inside Cross Validation

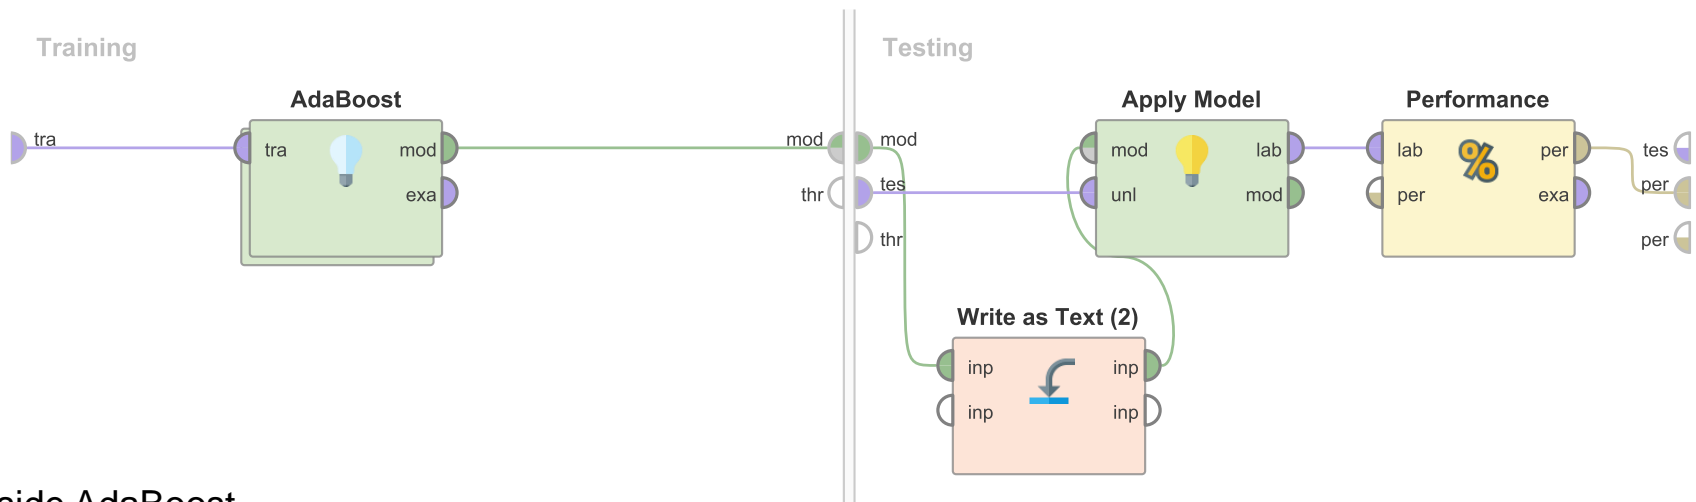

### Inside AdaBoost

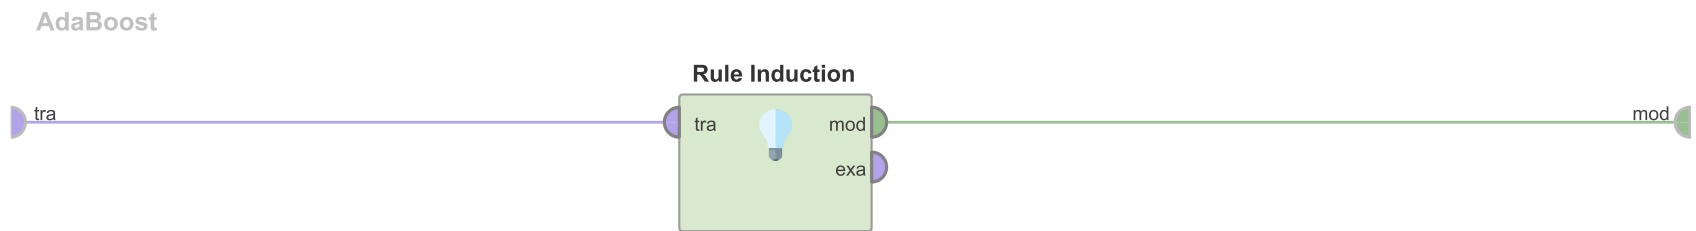

# 3) AdaBoost + Decision Stump

## Top Level

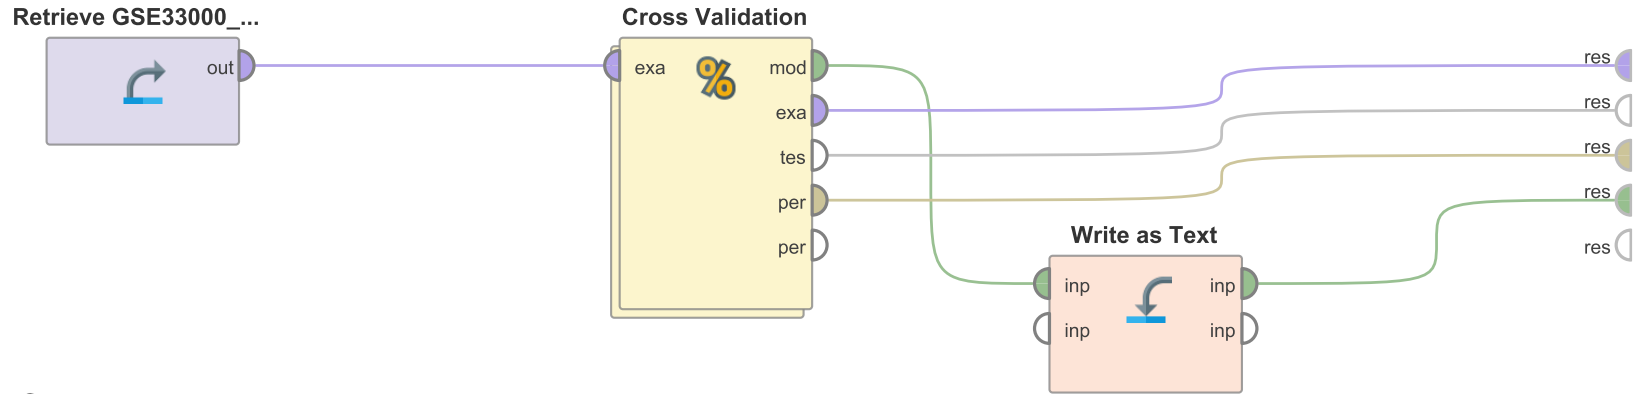

## Inside Cross Validation



## Inside AdaBoost

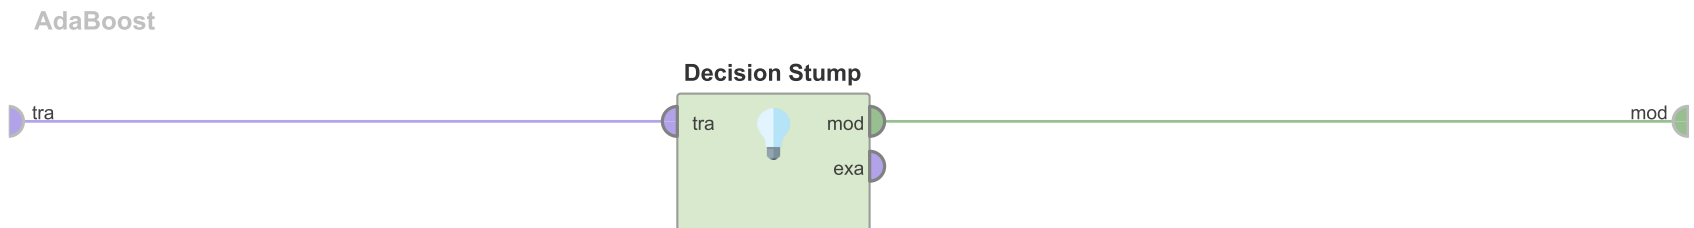

# 4) Generalized Linear Model

## Top Level

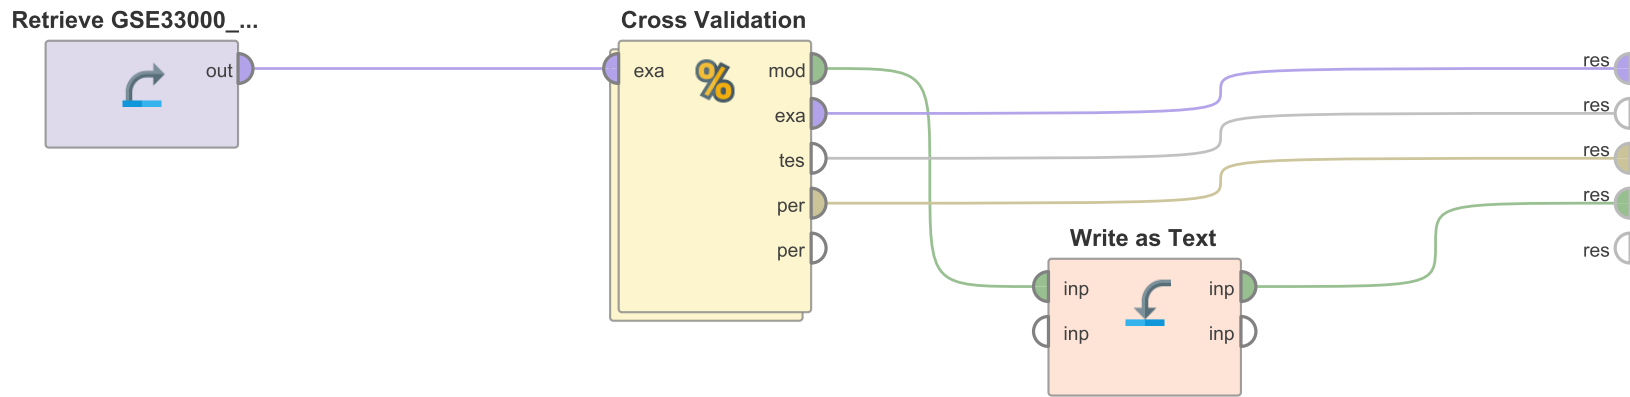

## Inside Cross Validation

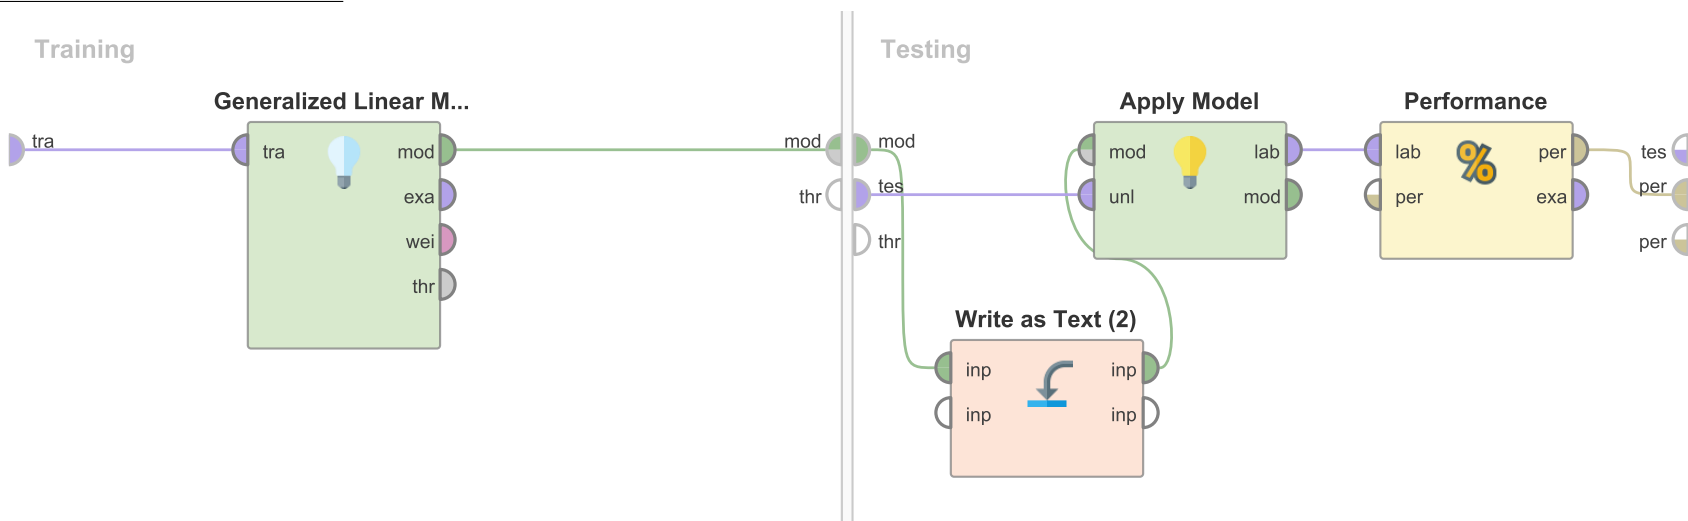

# 5) Logistic Regression

## Top Level

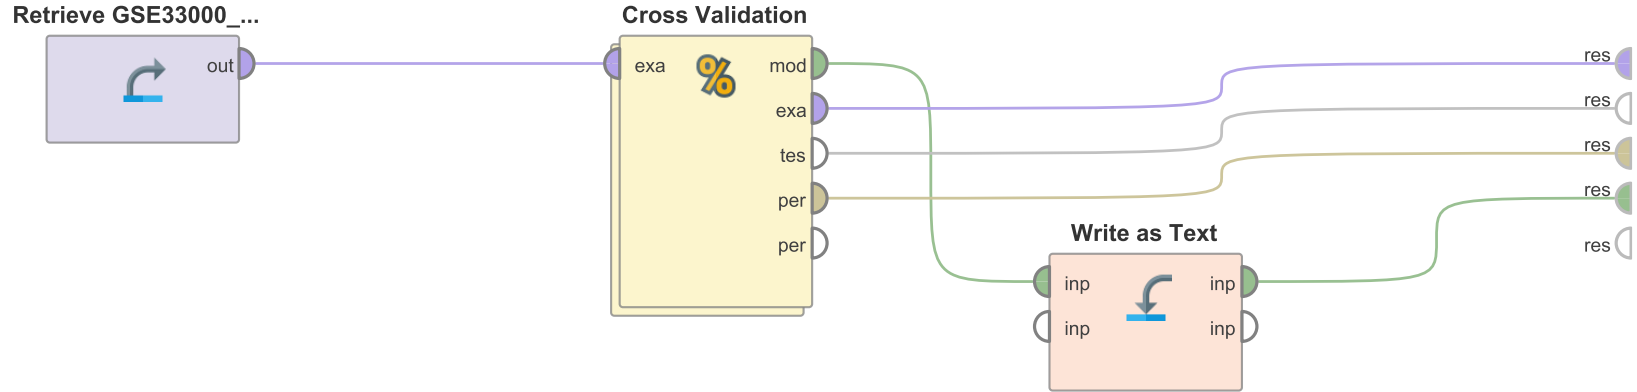

## Inside Cross Validation

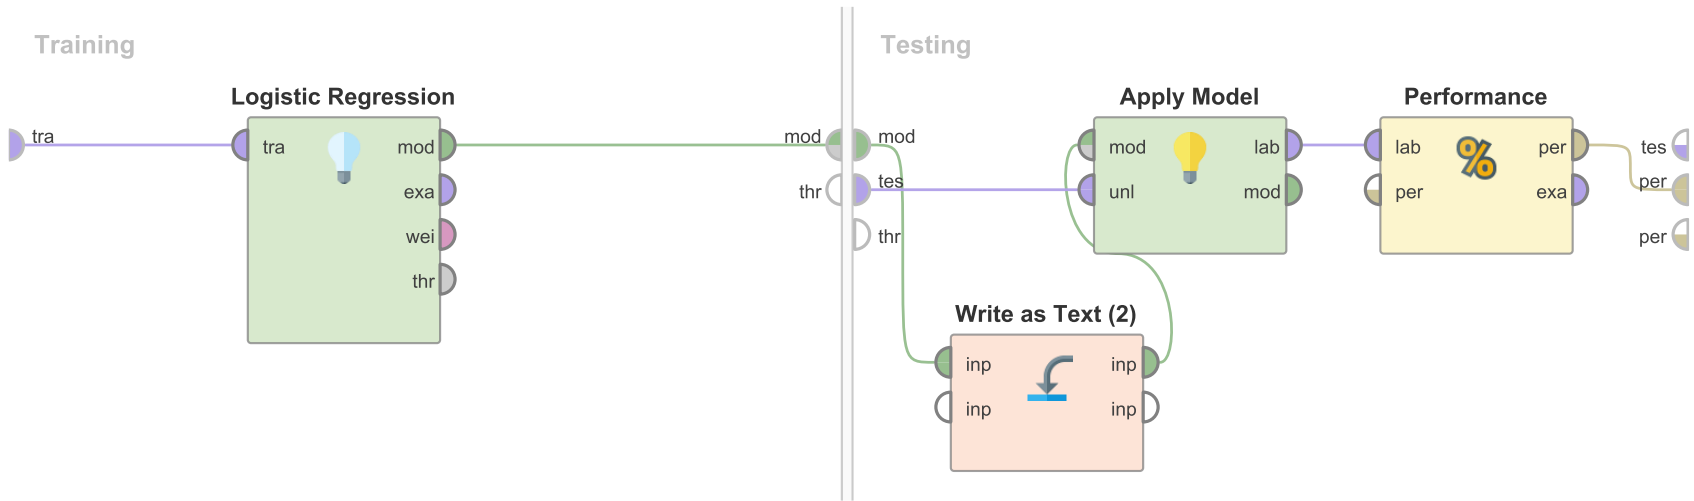

# 6) Gradient Boosted Trees

## Top Level

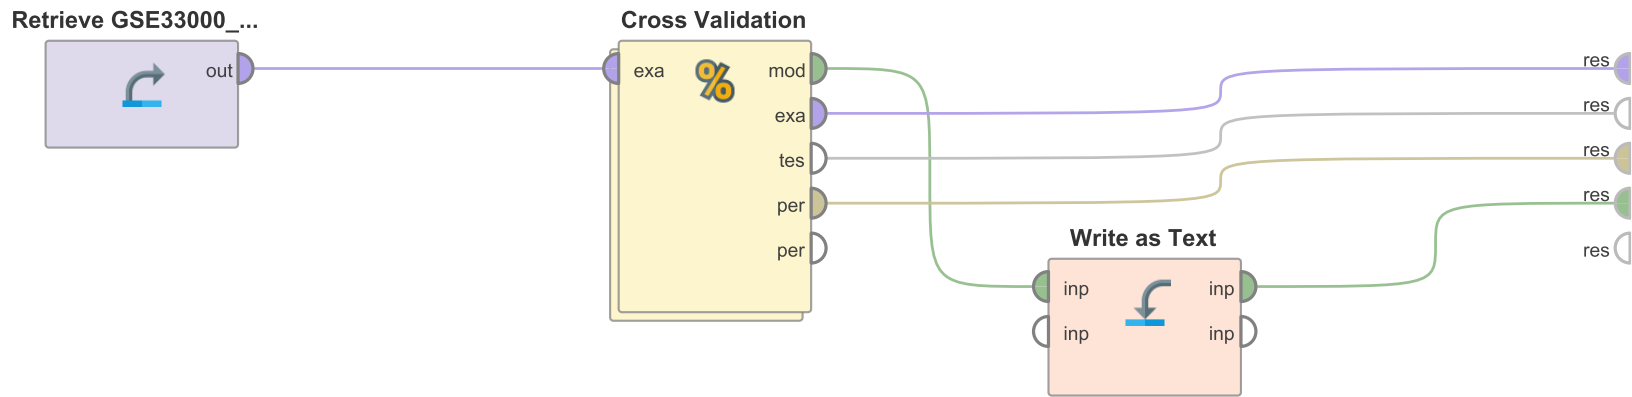

## Inside Cross Validation

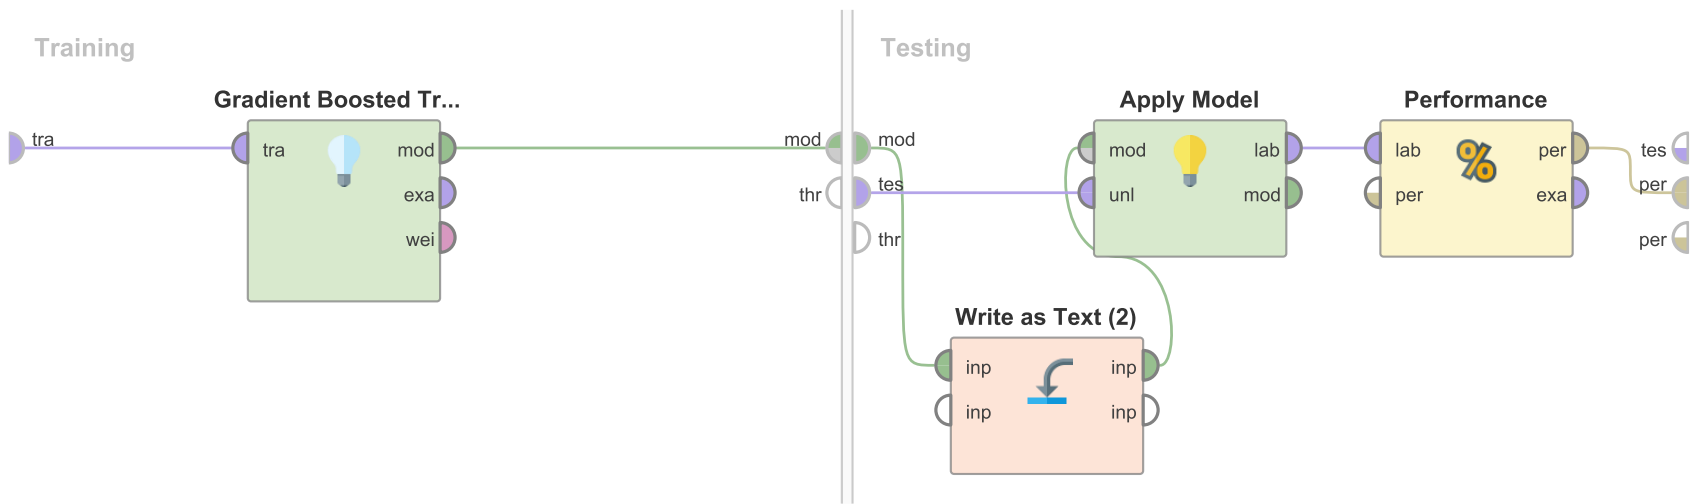

# 7) Random Forest + Weight by Tree Importance

## Top Level

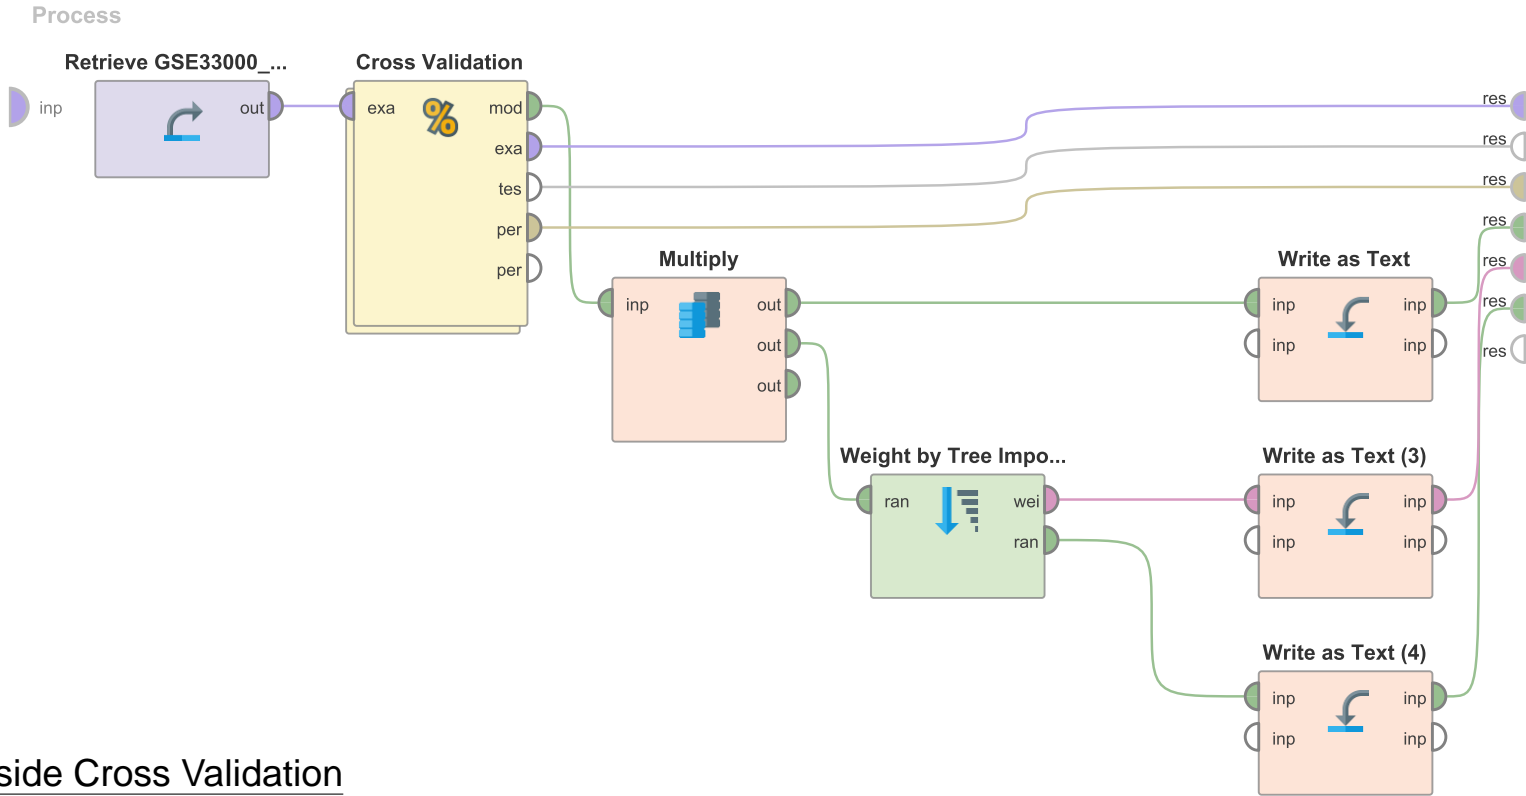

## Inside Cross Validation

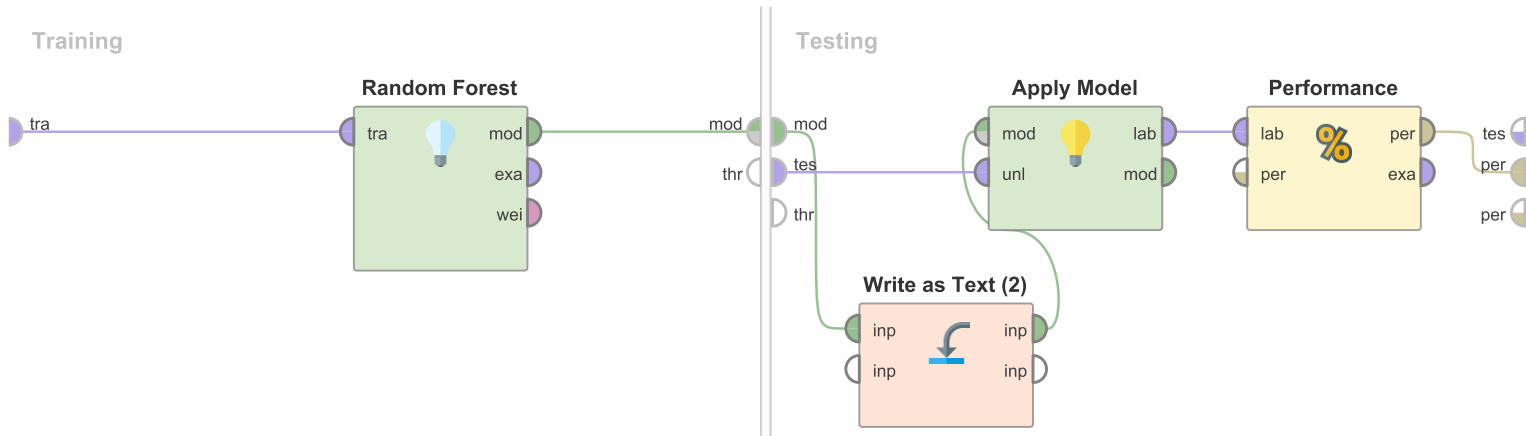

Supplement: 41598_2021_93085_MOESM5_ESM.pdf [file 41598_2021_93085_MOESM5_ESM.pdf]
