# Supplementary material for: Machine learning compensates fold-change method and highlights oxidative phosphorylation in the brain transcriptome of Alzheimer’s disease
Source: PubMed Central journal article supplement (PMC8249453; doi:10.1038/s41598-021-93085-z), 2021-07-01

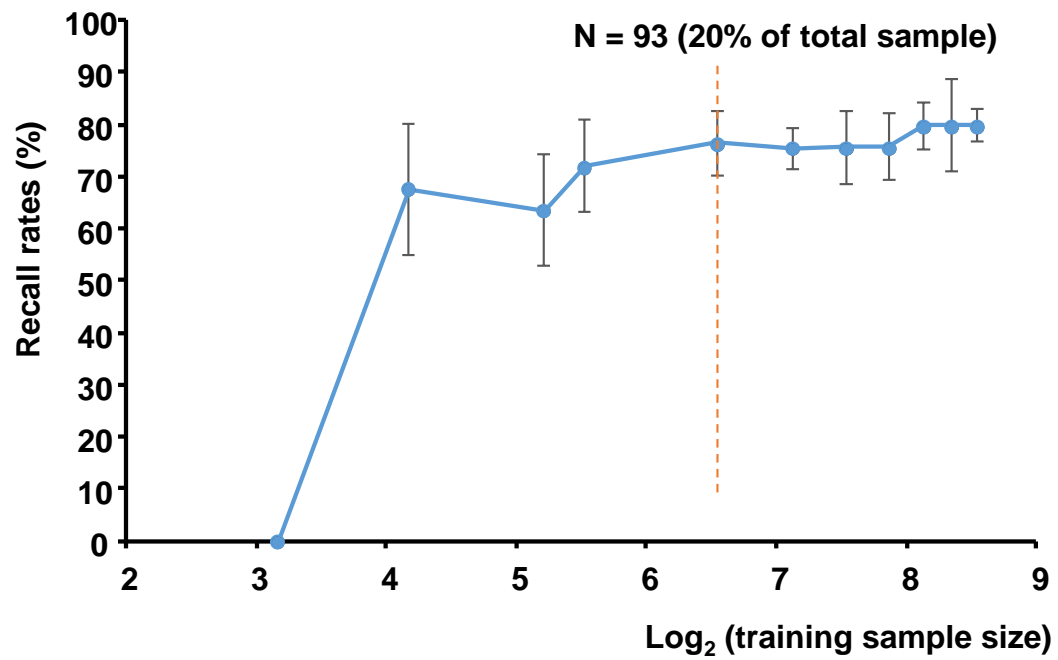

Supplement: 41598_2021_93085_MOESM9_ESM.pdf [file 41598_2021_93085_MOESM9_ESM.pdf]
